# Supplementary material for: Developing better digital health measures of Parkinson’s disease using free living data and a crowdsourced data analysis challenge
Source: PubMed Central journal article supplement (PMC10047543; doi:10.1371/journal.pdig.0000208), 2023-03-28
Supplement: pdig.0000208.s001.pdf [file pdig.0000208.s001.pdf]

**S1 Table:** Number of records (sensor data plus paired label) in the training/test splits for the CIS-PD cohort.

| Subject ID | On/off   |      | Dyskinesia |      | Tremor   |      |
|------------|----------|------|------------|------|----------|------|
|            | Training | Test | Training   | Test | Training | Test |
| 1004       | 82       | 27   | 82         | 27   | 82       | 27   |
| 1006       | 37       | 12   | 0          | 0    | 37       | 12   |
| 1007       | 276      | 91   | 299        | 99   | 299      | 99   |
| 1019       | 45       | 15   | 45         | 15   | 45       | 15   |
| 1020       | 195      | 65   | 0          | 0    | 195      | 65   |
| 1023       | 106      | 35   | 106        | 35   | 106      | 35   |
| 1032       | 177      | 59   | 0          | 0    | 177      | 59   |
| 1034       | 40       | 14   | 40         | 14   | 40       | 14   |
| 1038       | 207      | 70   | 207        | 70   | 207      | 70   |
| 1039       | 130      | 43   | 130        | 43   | 0        | 0    |
| 1043       | 34       | 12   | 34         | 12   | 34       | 12   |
| 1044       | 72       | 24   | 72         | 24   | 0        | 0    |
| 1046       | 0        | 0    | 0          | 0    | 67       | 22   |
| 1048       | 91       | 30   | 91         | 30   | 91       | 30   |
| 1049       | 82       | 27   | 82         | 27   | 82       | 27   |
| 1051       | 193      | 63   | 0          | 0    | 0        | 0    |
