# Supplementary material for: Developing better digital health measures of Parkinson’s disease using free living data and a crowdsourced data analysis challenge
Source: PubMed Central journal article supplement (PMC10047543; doi:10.1371/journal.pdig.0000208), 2023-03-28
Supplement: pdig.0000208.s002.pdf [file pdig.0000208.s002.pdf]

**S2 Table:** Number of records (sensor data plus paired label) in the training/test splits for the REAL-PD cohort.

| Subject ID | On/off   |      | Dyskinesia |      | Tremor   |      |
|------------|----------|------|------------|------|----------|------|
|            | Training | Test | Training   | Test | Training | Test |
| hbv012     | 0        | 0    | 0          | 0    | 42       | 13   |
| hbv013     | 65       | 22   | 65         | 22   | 67       | 22   |
| hbv014     | 46       | 15   | 0          | 0    | 0        | 0    |
| hbv017     | 0        | 0    | 68         | 23   | 0        | 0    |
| hbv018     | 0        | 0    | 32         | 10   | 0        | 0    |
| hbv022     | 55       | 18   | 0          | 0    | 56       | 18   |
| hbv023     | 0        | 0    | 0          | 0    | 46       | 15   |
| hbv038     | 44       | 14   | 0          | 0    | 43       | 14   |
| hbv043     | 37       | 12   | 37         | 12   | 0        | 0    |
| hbv051     | 40       | 13   | 0          | 0    | 0        | 0    |
| hbv054     | 0        | 0    | 54         | 19   | 58       | 19   |
| hbv077     | 42       | 14   | 0          | 0    | 0        | 0    |
