# Supplementary material for: Developing better digital health measures of Parkinson’s disease using free living data and a crowdsourced data analysis challenge
Source: PubMed Central journal article supplement (PMC10047543; doi:10.1371/journal.pdig.0000208), 2023-03-28
Supplement: pdig.0000208.s003.pdf [file pdig.0000208.s003.pdf]

**S3 Table:** P-value for association of top 10 features from team dbmi with label for on/off, dyskinesia and tremor

|                                              | <b>on_off*</b> | <b>dyskinesia*</b> | <b>tremor*</b> |
|----------------------------------------------|----------------|--------------------|----------------|
| <b>quantile__q_0.7</b>                       | 0.341          | 0.76241            | 0.260796       |
| <b>number_peaks__n_1</b>                     | 0.220          | 0.308912           | 0.453108       |
| <b>quantile__q_0.2</b>                       | 0.4014         | 0.054511           | 0.80456        |
| <b>quantile__q_0.4</b>                       | 0.574647       | 0.757697           | 0.613633       |
| <b>quantile__q_0.8</b>                       | 0.830643       | 0.956247           | 0.872984       |
| <b>sum_values</b>                            | 0.825521       | 0.853557           | 0.677784       |
| <b>quantile__q_0.3</b>                       | 0.850645       | 0.167818           | 0.536281       |
| <b>fft_coefficient__coeff_0__attr_"real"</b> | 0.884536       | 0.738591           | 0.89858        |
| <b>mean</b>                                  | 0.748474       | 0.919004           | 0.636074       |
| <b>fft_coefficient__coeff_0__attr_"abs"</b>  | 0.942655       | 0.687168           | 0.575989       |

\* Shown are the p-values for testing for association between magnitude of feature SHAP value and label. For each column, a t-test was performed to compare models trained on the column label against models trained on other labels. No tests were significant at  $\alpha = 0.05$  implying that none of the features were specific to individual phenotypes.
