# Supplementary material for: Developing better digital health measures of Parkinson’s disease using free living data and a crowdsourced data analysis challenge
Source: PubMed Central journal article supplement (PMC10047543; doi:10.1371/journal.pdig.0000208), 2023-03-28
Supplement: pdig.0000208.s004.pdf [file pdig.0000208.s004.pdf]

**S4 Table:** Association (Kendall's tau) of subject characteristics with model improvement (on/off medication)

|       |                | dbmi   |       | HaProzdor |       | ROC BEAT-PD |       | hecky  |       | Yuanfang Guan |       | Problem Solver |       | Meta-Analysis p-val |
|-------|----------------|--------|-------|-----------|-------|-------------|-------|--------|-------|---------------|-------|----------------|-------|---------------------|
|       |                | tau    | p-val | tau       | p-val | tau         | p-val | tau    | p-val | tau           | p-val | tau            | p-val |                     |
|       | n              | 0.225  | 0.149 | 0.107     | 0.495 | 0.330       | 0.034 | 0.172  | 0.270 | 0.234         | 0.134 | 0.189          | 0.224 | 0.158               |
|       | Age            | 0.048  | 0.804 | 0.048     | 0.804 | -0.106      | 0.585 | 0.144  | 0.457 | -0.144        | 0.457 | 0.144          | 0.457 | 0.905               |
| UPDRS | Part I         | 0.250  | 0.219 | 0.333     | 0.102 | 0.083       | 0.682 | 0.270  | 0.183 | 0.250         | 0.219 | 0.499          | 0.014 | 0.131               |
|       | Part II        | 0.217  | 0.272 | 0.276     | 0.162 | 0.059       | 0.764 | 0.177  | 0.369 | 0.039         | 0.842 | 0.177          | 0.369 | 0.399               |
|       | Part IV        | 0.000  | 1.000 | -0.039    | 0.842 | 0.020       | 0.920 | -0.099 | 0.617 | 0.158         | 0.424 | 0.375          | 0.058 | 0.710               |
|       | Part III (Off) | 0.260  | 0.221 | 0.416     | 0.050 | 0.286       | 0.178 | 0.312  | 0.142 | 0.338         | 0.111 | 0.260          | 0.221 | 0.127               |
|       | Part III (On)  | 0.107  | 0.621 | 0.267     | 0.217 | 0.080       | 0.711 | 0.107  | 0.621 | 0.053         | 0.805 | -0.107         | 0.621 | 0.680               |
|       | Reporting Lag  | -0.067 | 0.770 | -0.105    | 0.626 | 0.067       | 0.770 | -0.048 | 0.846 | 0.124         | 0.559 | 0.105          | 0.626 | 0.946               |
|       | Label Variance | 0.543  | 0.004 | 0.429     | 0.027 | 0.486       | 0.011 | 0.448  | 0.021 | 0.543         | 0.004 | 0.410          | 0.036 | 0.010               |
