# Supplementary material for: Developing better digital health measures of Parkinson’s disease using free living data and a crowdsourced data analysis challenge
Source: PubMed Central journal article supplement (PMC10047543; doi:10.1371/journal.pdig.0000208), 2023-03-28
Supplement: pdig.0000208.s005.pdf [file pdig.0000208.s005.pdf]

**S5 Table:** Association (Kendall's tau) of subject characteristics with model improvement (dyskinesia)

|       |                | ROC BEAT-PD |       | Yuanfang Guan |       | hecky  |       | Meta-Analysis p-val |
|-------|----------------|-------------|-------|---------------|-------|--------|-------|---------------------|
|       |                | tau         | p-val | tau           | p-val | tau    | p-val |                     |
|       | n              | -0.202      | 0.279 | 0.034         | 0.857 | -0.134 | 0.470 | 0.692               |
|       | Age            | -0.537      | 0.023 | -0.278        | 0.240 | -0.241 | 0.309 | 0.273               |
| UPDRS | Part I         | -0.101      | 0.681 | 0.060         | 0.805 | -0.141 | 0.565 | 0.856               |
|       | Part II        | -0.305      | 0.205 | -0.229        | 0.342 | -0.076 | 0.751 | 0.529               |
|       | Part IV        | -0.057      | 0.813 | -0.094        | 0.694 | -0.623 | 0.009 | 0.417               |
|       | Part III (Off) | 0.386       | 0.125 | 0.114         | 0.652 | 0.205  | 0.417 | 0.496               |
|       | Part III (On)  | 0.092       | 0.717 | 0.138         | 0.587 | 0.414  | 0.103 | 0.533               |
|       | Reporting Lag  | -0.309      | 0.218 | -0.418        | 0.087 | -0.455 | 0.060 | 0.220               |
|       | Label Variance | 0.636       | 0.006 | 0.382         | 0.121 | 0.127  | 0.648 | 0.231               |
