# Supplementary material for: Developing better digital health measures of Parkinson’s disease using free living data and a crowdsourced data analysis challenge
Source: PubMed Central journal article supplement (PMC10047543; doi:10.1371/journal.pdig.0000208), 2023-03-28
Supplement: pdig.0000208.s006.pdf [file pdig.0000208.s006.pdf]

**S6 Table:** Association (Kendall's tau) of subject characteristics with model improvement (tremor)

|       |                | Yuanfang Guan |       | dbmi   |       | ROC BEAT-PD |       | HaProzdor |       | Problem Solver |       | hecky  |       | Meta-Analysis p-val |
|-------|----------------|---------------|-------|--------|-------|-------------|-------|-----------|-------|----------------|-------|--------|-------|---------------------|
|       |                | tau           | p-val | tau    | p-val | tau         | p-val | tau       | p-val | tau            | p-val | tau    | p-val |                     |
|       | n              | -0.131        | 0.440 | -0.190 | 0.261 | 0.083       | 0.623 | 0.000     | 1.000 | 0.202          | 0.233 | -0.024 | 0.888 | 0.951               |
|       | Age            | -0.194        | 0.359 | 0.116  | 0.582 | -0.090      | 0.669 | -0.260    | 0.221 | -0.297         | 0.160 | -0.271 | 0.199 | 0.417               |
| UPDRS | Part I         | 0.406         | 0.062 | 0.352  | 0.106 | 0.406       | 0.062 | 0.123     | 0.575 | 0.433          | 0.046 | 0.379  | 0.081 | 0.086               |
|       | Part II        | 0.278         | 0.196 | 0.464  | 0.031 | 0.066       | 0.758 | 0.133     | 0.537 | 0.066          | 0.758 | 0.013  | 0.951 | 0.404               |
|       | Part IV        | 0.225         | 0.295 | -0.066 | 0.758 | 0.331       | 0.123 | -0.187    | 0.387 | 0.331          | 0.123 | -0.013 | 0.951 | 0.611               |
|       | Part III (Off) | 0.330         | 0.160 | 0.257  | 0.274 | 0.183       | 0.435 | 0.537     | 0.023 | 0.294          | 0.212 | 0.330  | 0.160 | 0.157               |
|       | Part III (On)  | -0.075        | 0.753 | 0.112  | 0.637 | 0.000       | 1.000 | 0.321     | 0.180 | -0.112         | 0.637 | 0.037  | 0.875 | 0.836               |
|       | Reporting Lag  | 0.179         | 0.435 | 0.179  | 0.435 | 0.385       | 0.076 | -0.039    | 0.855 | 0.282          | 0.204 | -0.154 | 0.510 | 0.699               |
|       | Label Variance | 0.590         | 0.004 | 0.282  | 0.204 | 0.282       | 0.204 | 0.090     | 0.669 | 0.385          | 0.076 | 0.205  | 0.367 | 0.132               |
