# Supplementary material for: Developing better digital health measures of Parkinson’s disease using free living data and a crowdsourced data analysis challenge
Source: PubMed Central journal article supplement (PMC10047543; doi:10.1371/journal.pdig.0000208), 2023-03-28
Supplement: pdig.0000208.s007.pdf [file pdig.0000208.s007.pdf]

**S7 Table:** Validation of models in clinically labeled segments (on/off medication)

| Subject ID              | dbmi        |                 | haProzdor   |                 | ROC BEAT-PD |                 | Yuanfang Guan |                 |
|-------------------------|-------------|-----------------|-------------|-----------------|-------------|-----------------|---------------|-----------------|
|                         | Correlation | P-value*        | Correlation | P-value         | Correlation | P-value         | Correlation   | P-value         |
| 1004                    | 0.324       | 0.002           | 0.387       | 1.41E-04        | 0.316       | 0.002           | 0.493         | 4.76E-06        |
| 1007                    | 0.176       | 0.111           | 0.109       | 0.212           | 0.046       | 0.369           | -0.093        | 0.742           |
| 1019                    | 0.036       | 0.365           | -0.015      | 0.557           | 0.335       | 3.69E-04        | -0.166        | 0.943           |
| 1020                    | -0.006      | 0.508           | 0.271       | 0.174           | 0.296       | 0.152           | -0.028        | 0.537           |
| 1023                    | -0.051      | 0.689           | -0.063      | 0.733           | 0.033       | 0.372           | 0.207         | 0.021           |
| 1032                    | 0.348       | 2.59E-04        | -0.040      | 0.650           | -0.292      | 0.998           | 0.040         | 0.349           |
| 1038                    | 0.146       | 0.092           | 0.225       | 0.019           | -0.187      | 0.957           | 0.495         | 9.80E-07        |
| 1039                    | 0.275       | 0.004           | -0.002      | 0.507           | 0.045       | 0.331           | 0.027         | 0.397           |
| 1043                    | 0.377       | 6.58E-05        | 0.268       | 0.004           | 0.144       | 0.079           | 0.336         | 4.96E-04        |
| 1044                    | 0.361       | 1.64E-04        | NA**        | NA              | -0.188      | 0.968           | 0.092         | 0.188           |
| 1046                    | NA          | NA              | NA          | NA              | 0.152       | 0.067           | NA            | NA              |
| 1048                    | 0.258       | 0.011           | 0.372       | 3.11E-04        | -0.109      | 0.833           | 0.274         | 0.008           |
| 1049                    | -0.192      | 0.960           | -0.032      | 0.612           | -0.186      | 0.955           | 0.017         | 0.439           |
| 1051                    | 0.280       | 0.003           | -0.033      | 0.628           | 0.410       | 1.40E-05        | -0.367        | 1.000           |
| <b>Meta-Analysis***</b> |             | <b>1.80e-12</b> |             | <b>1.04e-05</b> |             | <b>9.81e-06</b> |               | <b>6.28E-10</b> |

\* One-sided  $p$ -value

\*\* NA indicates that a model could not produce a prediction for this individual or that the prediction was constant for all segments

\*\*\* Unadjusted  $p$ -value
