# Supplementary material for: Developing better digital health measures of Parkinson’s disease using free living data and a crowdsourced data analysis challenge
Source: PubMed Central journal article supplement (PMC10047543; doi:10.1371/journal.pdig.0000208), 2023-03-28
Supplement: pdig.0000208.s008.pdf [file pdig.0000208.s008.pdf]

**S8 Table:** Validation of models in clinically labeled segments (dyskinesia)

| Subject ID              | ROC BEAT-PD |              | Yuanfang Guan |              | HaProzdor   |              | dbmi        |              |
|-------------------------|-------------|--------------|---------------|--------------|-------------|--------------|-------------|--------------|
|                         | Correlation | P-value*     | Correlation   | P-value      | Correlation | P-value      | Correlation | P-value      |
| 1004                    | -0.231      | 0.986        | -0.371        | 1.000        | -0.131      | 0.890        | -0.306      | 0.998        |
| 1020                    | -0.299      | 0.861        | NA*           | NA           | NA          | NA           | NA          | NA           |
| 1023                    | 0.107       | 0.138        | -0.034        | 0.634        | NA          | NA           | 0.075       | 0.224        |
| 1039                    | 0.115       | 0.121        | 0.015         | 0.438        | 0.047       | 0.318        | -0.011      | 0.541        |
| 1043                    | 0.068       | 0.245        | -0.229        | 0.990        | NA          | NA           | 0.051       | 0.301        |
| 1048                    | 0.286       | 0.003        | 0.118         | 0.136        | NA          | NA           | 0.290       | 0.004        |
| 1049                    | 0.049       | 0.321        | -0.076        | 0.762        | -0.155      | 0.929        | -0.004      | 0.513        |
| <b>Meta-Analysis***</b> |             | <b>0.035</b> |               | <b>0.850</b> |             | <b>0.849</b> |             | <b>0.082</b> |

\* One-sided  $p$ -values reported

\*\* NA indicates that a model could not produce a prediction for this individual or that the prediction was constant for all segments

\*\*\* Unadjusted  $p$ -value
