# Supplementary material for: Developing better digital health measures of Parkinson’s disease using free living data and a crowdsourced data analysis challenge
Source: PubMed Central journal article supplement (PMC10047543; doi:10.1371/journal.pdig.0000208), 2023-03-28
Supplement: pdig.0000208.s009.pdf [file pdig.0000208.s009.pdf]

**S9 Table:** Validation of models in clinically labeled segments (tremor)

| Subject ID              | Yuanfang Guan |              | dbmi        |                 | ROC BEAT-PD |              | haProzdor   |                 |
|-------------------------|---------------|--------------|-------------|-----------------|-------------|--------------|-------------|-----------------|
|                         | Correlation   | P-value*     | Correlation | P-value         | Correlation | P-value      | Correlation | P-value         |
| 1004                    | 0.145         | 0.086        | 0.215       | 0.024           | 0.032       | 0.384        | 0.480       | 8.38E-07        |
| 1007                    | -0.038        | 0.614        | 0.025       | 0.428           | -0.043      | 0.627        | NA          | NA              |
| 1019                    | -0.050        | 0.694        | -0.078      | 0.780           | -0.146      | 0.931        | -0.059      | 0.724           |
| 1020                    | 0.159         | 0.286        | 0.002       | 0.497           | 0.168       | 0.275        | 0.171       | 0.271           |
| 1023                    | -0.049        | 0.690        | -0.040      | 0.658           | -0.010      | 0.539        | NA          | NA              |
| 1032                    | -0.050        | 0.696        | 0.392       | 1.95E-05        | 0.100       | 0.155        | 0.037       | 0.353           |
| 1038                    | 0.081         | 0.222        | 0.178       | 0.045           | 0.040       | 0.352        | 0.018       | 0.432           |
| 1039                    | 0.009         | 0.462        | NA          | NA              | 0.122       | 0.108        | NA          | NA              |
| 1043                    | 0.124         | 0.104        | 0.256       | 0.004           | 0.126       | 0.101        | 0.200       | 0.021           |
| 1046                    | 0.267         | 0.003        | -0.305      | 0.999           | 0.077       | 0.216        | NA          | NA              |
| 1048                    | 0.099         | 0.179        | 0.509       | 3.24E-07        | -0.183      | 0.956        | -0.110      | 0.846           |
| 1049                    | 0.096         | 0.183        | 0.273       | 0.004           | -0.172      | 0.949        | 0.043       | 0.341           |
| 1051                    | -0.027        | 0.606        | NA          | NA              | 0.093       | 0.173        | NA          | NA              |
| <b>Meta-Analysis***</b> |               | <b>0.047</b> |             | <b>1.97e-10</b> |             | <b>0.337</b> |             | <b>1.27e-04</b> |

\* One-sided  $p$ -value

\*\* NA indicates that a model could not produce a prediction for this individual or that the prediction was constant for all segments

\*\*\* Unadjusted  $p$ -value
