# Supplementary material for: Developing better digital health measures of Parkinson’s disease using free living data and a crowdsourced data analysis challenge
Source: PubMed Central journal article supplement (PMC10047543; doi:10.1371/journal.pdig.0000208), 2023-03-28
Supplement: pdig.0000208.s010.pdf [file pdig.0000208.s010.pdf]

**S10 Table:** REAL-PD proportion of records with sensor data from the smartphone, the smartwatch or both.

| Subject ID | Smartphone Only | Smartwatch Only | Both |
|------------|-----------------|-----------------|------|
| hbv012     | 0.38            | 0.02            | 0.60 |
| hbv013     | 0.15            | 0.36            | 0.48 |
| hbv014     | 0.00            | 0.02            | 0.98 |
| hbv017     | 0.02            | 0.05            | 0.92 |
| hbv018     | 0.11            | 0.35            | 0.54 |
| hbv022     | 0.04            | 0.09            | 0.87 |
| hbv023     | 0.00            | 0.13            | 0.87 |
| hbv038     | 0.33            | 0.03            | 0.64 |
| hbv043     | 0.02            | 0.16            | 0.82 |
| hbv051     | 0.07            | 0.00            | 0.93 |
| hbv054     | 0.00            | 0.05            | 0.95 |
| hbv077     | 0.10            | 0.03            | 0.86 |
