# Supplementary material for: Developing better digital health measures of Parkinson’s disease using free living data and a crowdsourced data analysis challenge
Source: PubMed Central journal article supplement (PMC10047543; doi:10.1371/journal.pdig.0000208), 2023-03-28
Supplement: pdig.0000208.s011.pdf [file pdig.0000208.s011.pdf]

**S11 Table:** REAL-PD medication status harmonization

| Original category                  | On/off | Dyskinesia |
|------------------------------------|--------|------------|
| Off                                | 1      | 0          |
| On without dyskinesia              | 0      | 0          |
| On with non-troublesome dyskinesia | 0      | 1          |
| On with severe dyskinesia          | 0      | 2          |
