# Supplementary material for: Developing better digital health measures of Parkinson’s disease using free living data and a crowdsourced data analysis challenge
Source: PubMed Central journal article supplement (PMC10047543; doi:10.1371/journal.pdig.0000208), 2023-03-28
Supplement: pdig.0000208.s014.pdf [file pdig.0000208.s014.pdf]

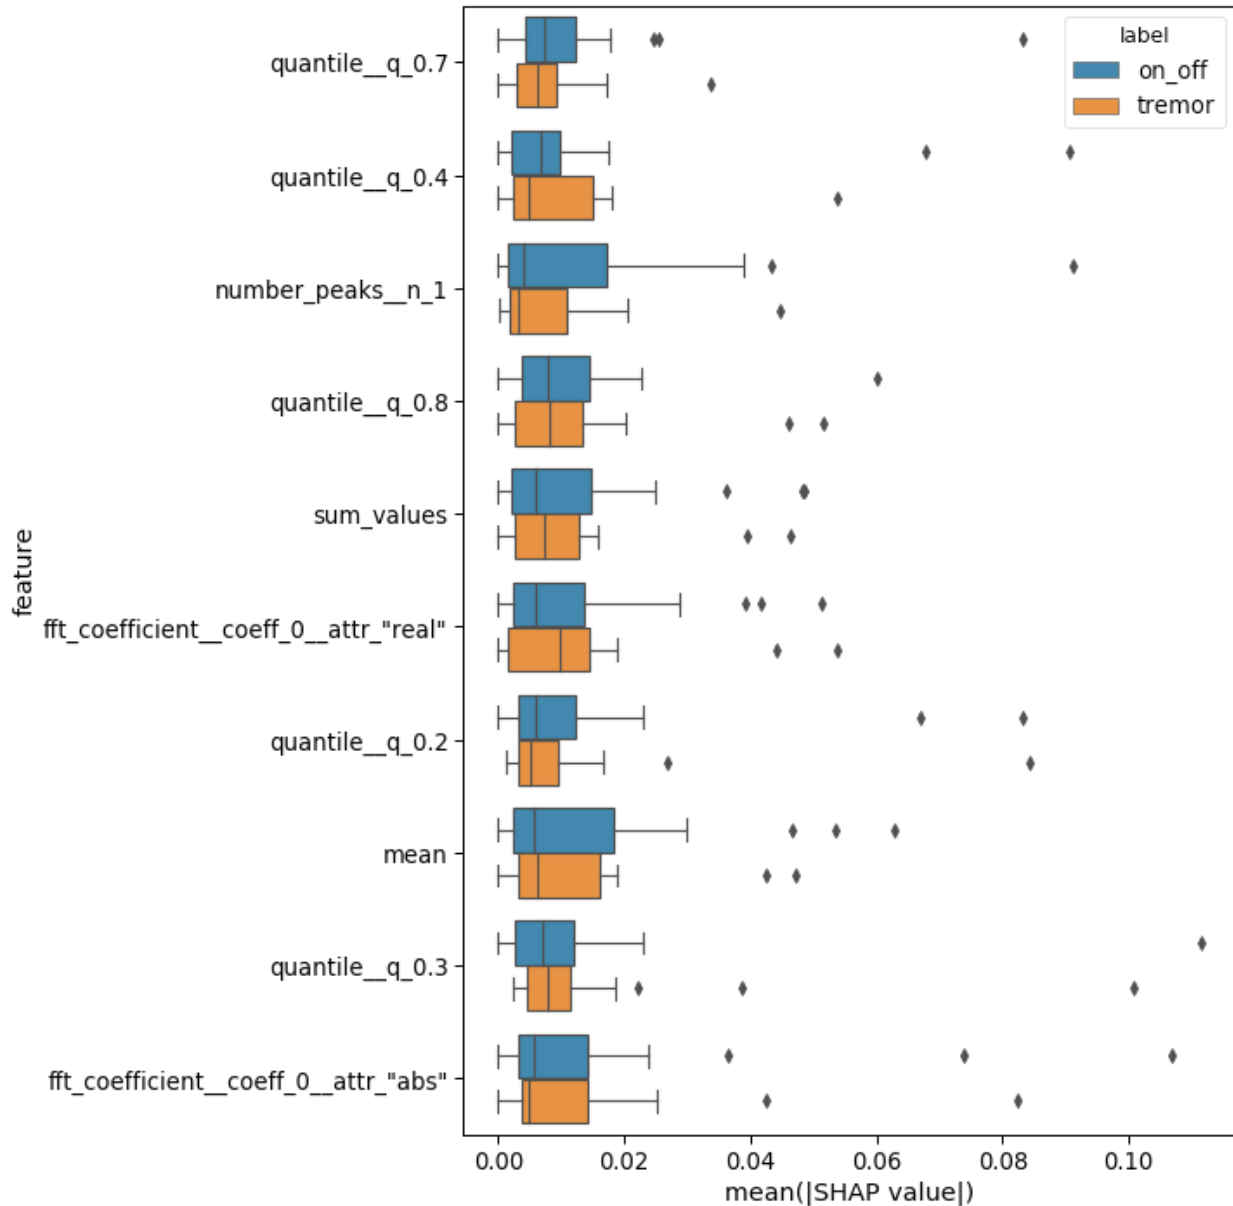

**S3 Fig:** Distributions of SHAP magnitude for the top 10 features over models for *tremor* (SC3) and *on\_off* (SC1) labels for the winning models of team dbmi. *quantile\_\_q\_{0.2, 0.3, 0.4, 0.7, 0.8}* are the 20, 30, 40, 70, and 80th data percentiles, respectively; *number\_peaks\_n\_1* is defined as the number of peaks of at least support 1; *sum\_values* is the sum over time series values; *mean* is the mean time series value; and *fft\_coefficient\_coeff\_0\_attr\_{"real", "abs"}* are the real component and absolute value of the 0th coefficient of the fast Fourier Transform (0 Hz), respectively.
