# Supplementary material for: Developing better digital health measures of Parkinson’s disease using free living data and a crowdsourced data analysis challenge
Source: PubMed Central journal article supplement (PMC10047543; doi:10.1371/journal.pdig.0000208), 2023-03-28
Supplement: pdig.0000208.s015.pdf [file pdig.0000208.s015.pdf]

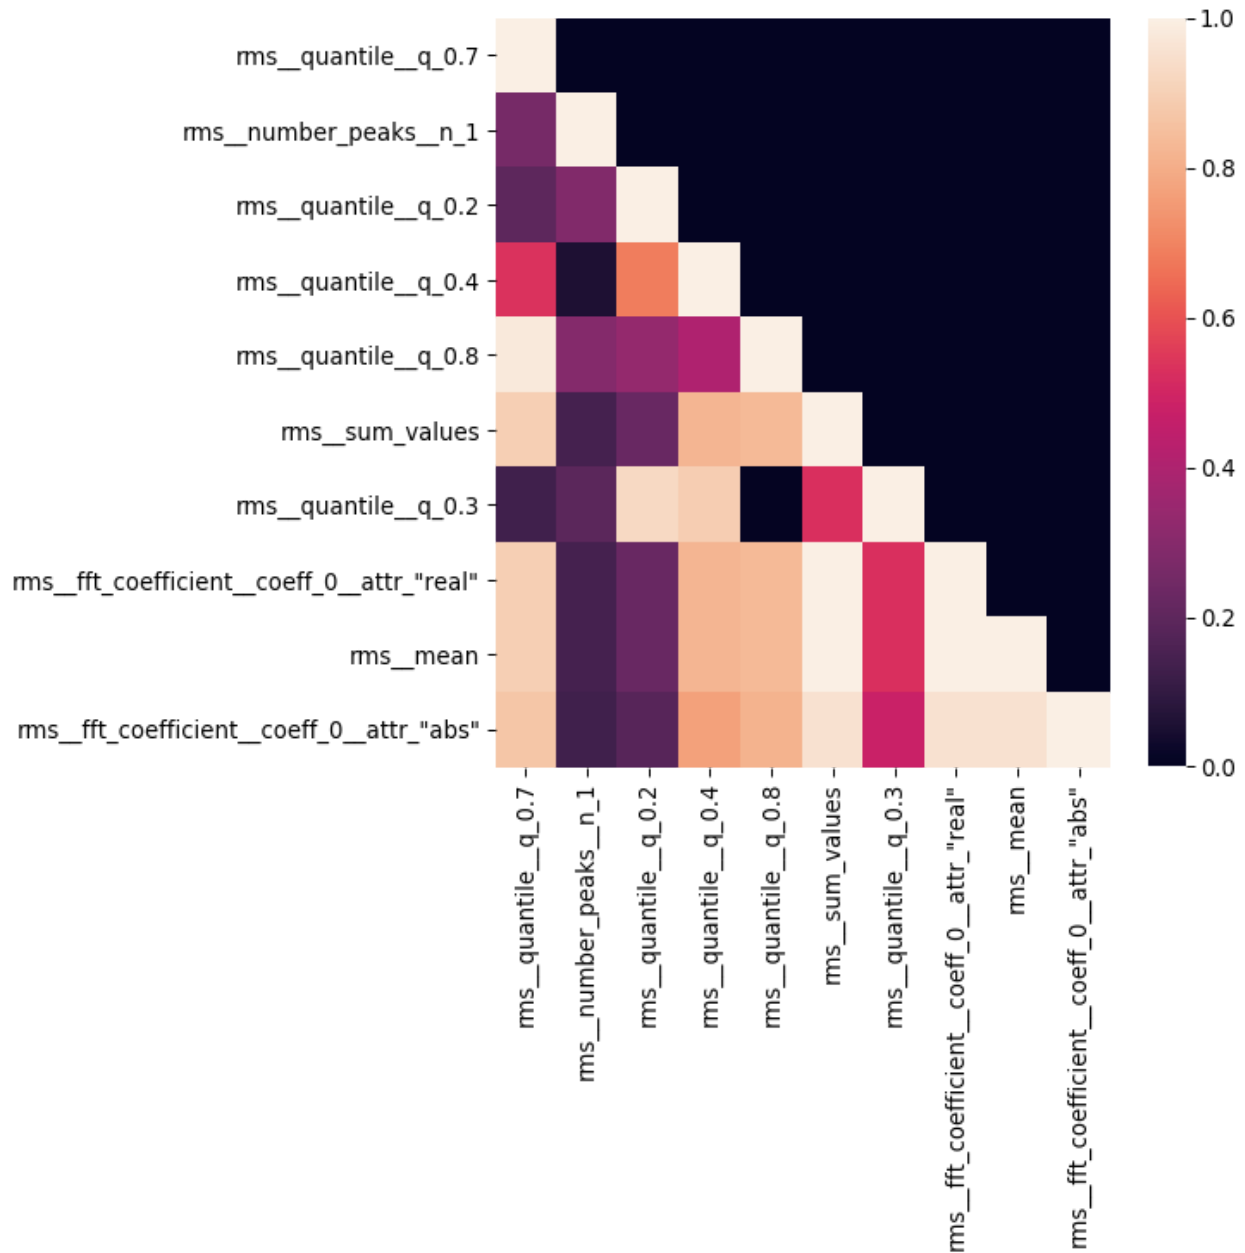

**S4 Fig:** Heatmap indicating strong correlation among top 10 features from the winning models of team dbmi in SC1 and SC3. Some features are definitionally equivalent (eg 0 Hz FFT component and mean), while others are very similar in definition (eg 30th and 40th percentiles) contributing to strong correlation.
