# Supplementary material for: Developing better digital health measures of Parkinson’s disease using free living data and a crowdsourced data analysis challenge
Source: PubMed Central journal article supplement (PMC10047543; doi:10.1371/journal.pdig.0000208), 2023-03-28
Supplement: pdig.0000208.s016.pdf [file pdig.0000208.s016.pdf]

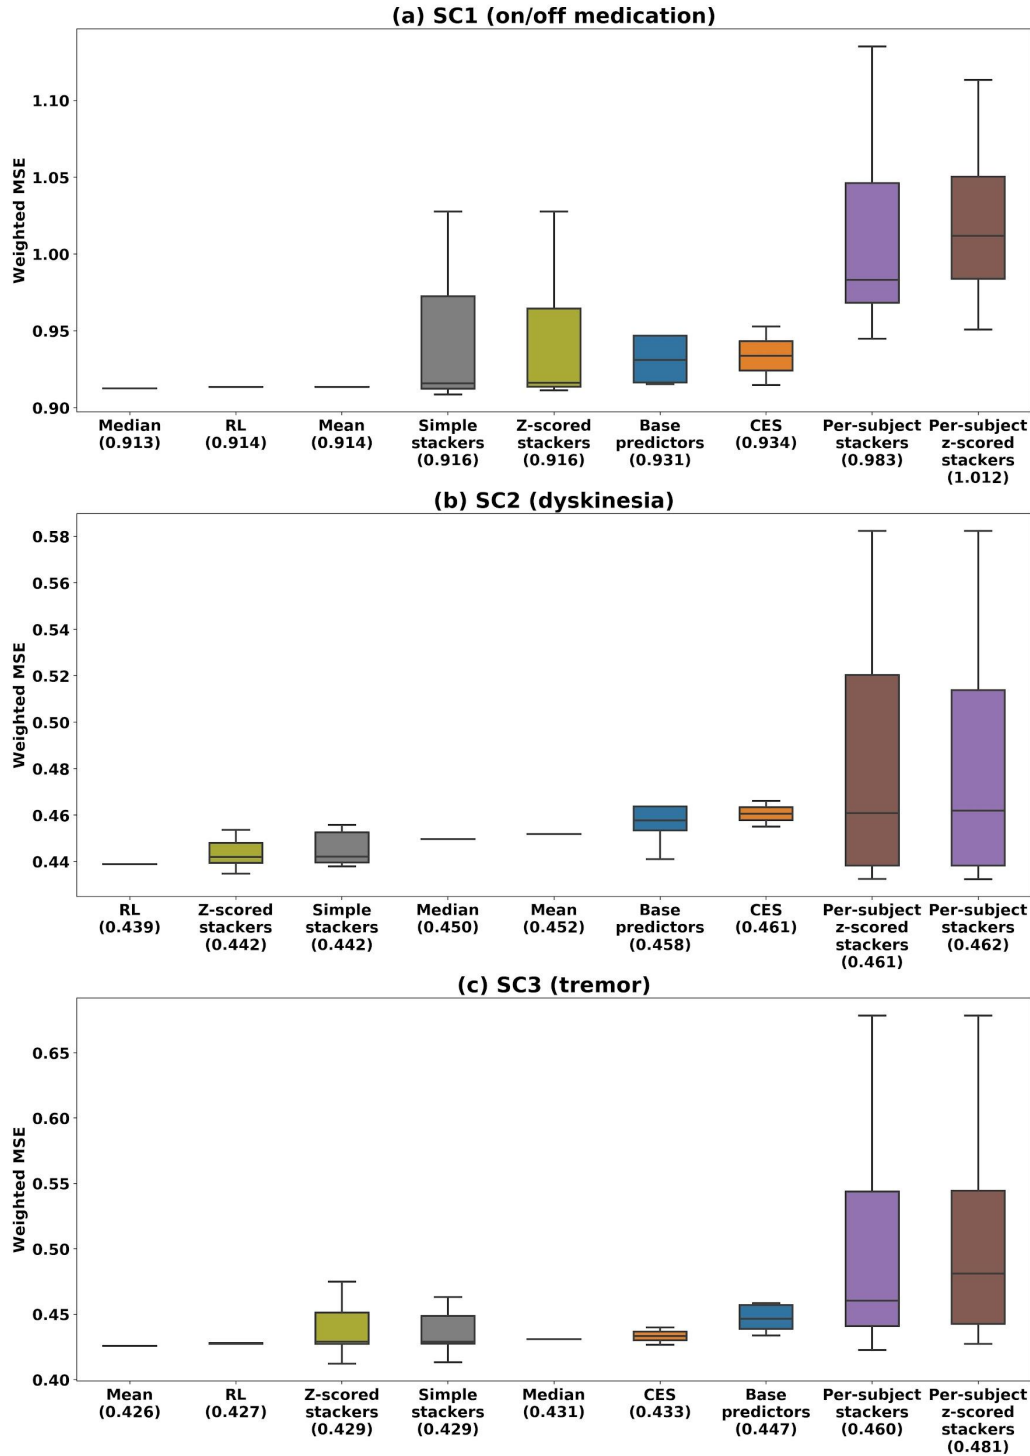

**S5 Fig:** Distributions of performance of the various categories of ensembles constructed for SC1-3 on the corresponding validation (6<sup>th</sup>) fold of the corresponding training sets. Also shown are the median scores of each category, as well as those of the five base predictors generated by the individual teams' methods.
