# Supplementary material for: Developing better digital health measures of Parkinson’s disease using free living data and a crowdsourced data analysis challenge
Source: PubMed Central journal article supplement (PMC10047543; doi:10.1371/journal.pdig.0000208), 2023-03-28
Supplement: pdig.0000208.s018.pdf [file pdig.0000208.s018.pdf]

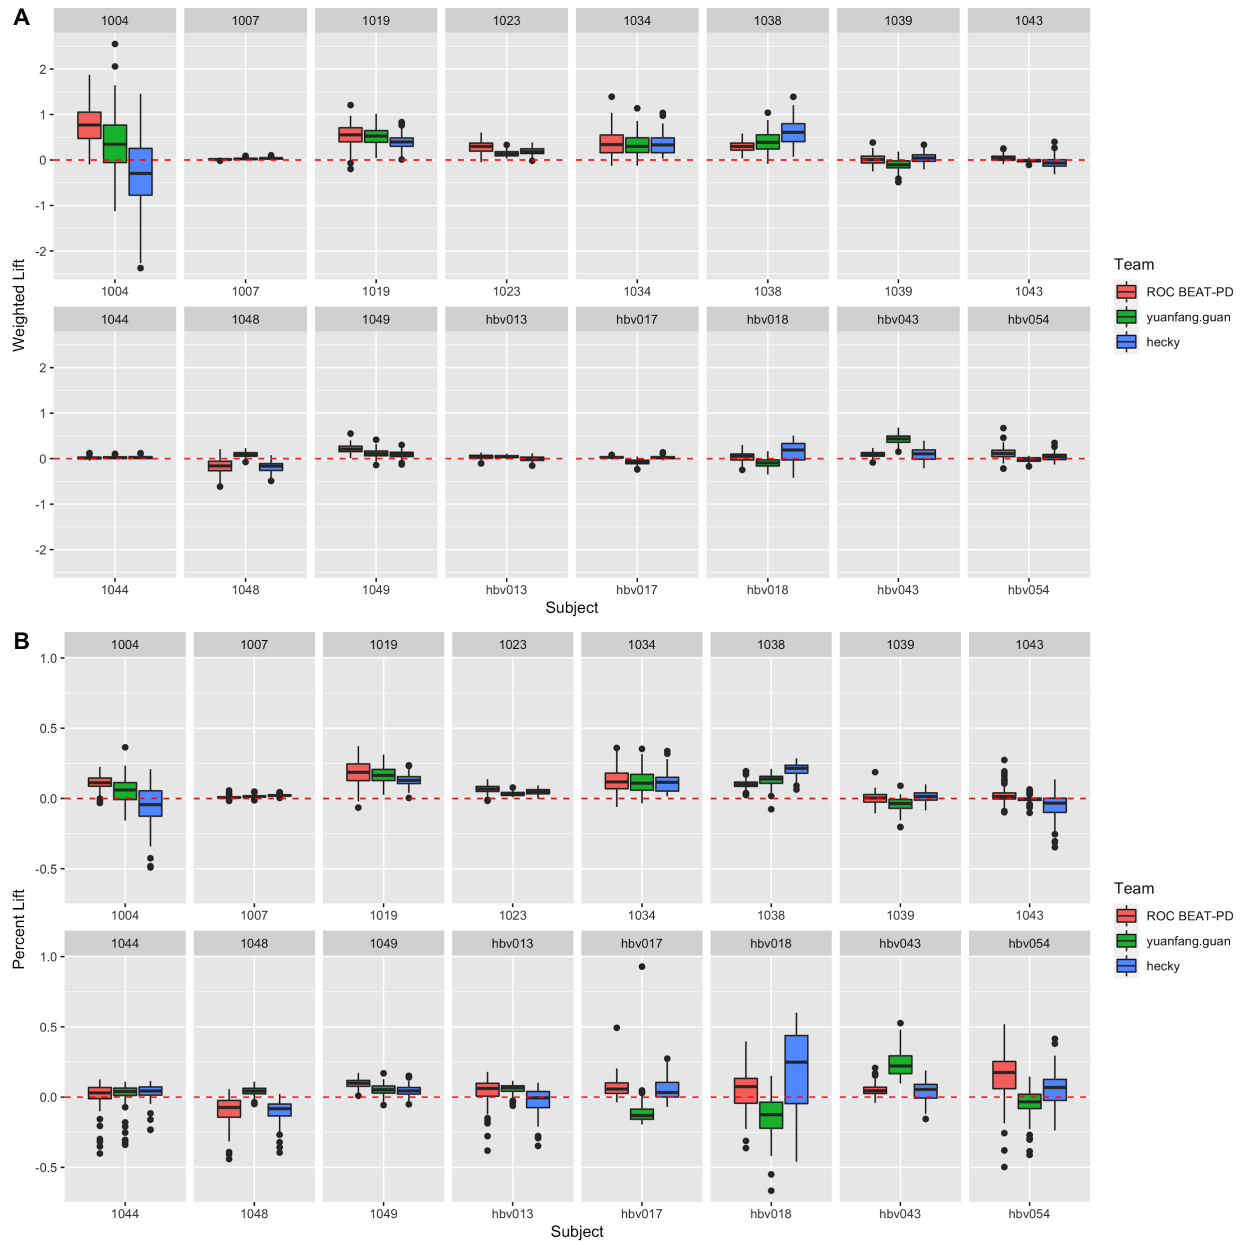

**S7 Fig:** Dyskinesia subject-specific lift. (A) Weighted by  $\sqrt{n}$  and (B) as a percentage of the null model MSE. Teams are ordered by overall rank.
