# Supplementary material for: Developing better digital health measures of Parkinson’s disease using free living data and a crowdsourced data analysis challenge
Source: PubMed Central journal article supplement (PMC10047543; doi:10.1371/journal.pdig.0000208), 2023-03-28
Supplement: pdig.0000208.s020.pdf [file pdig.0000208.s020.pdf]

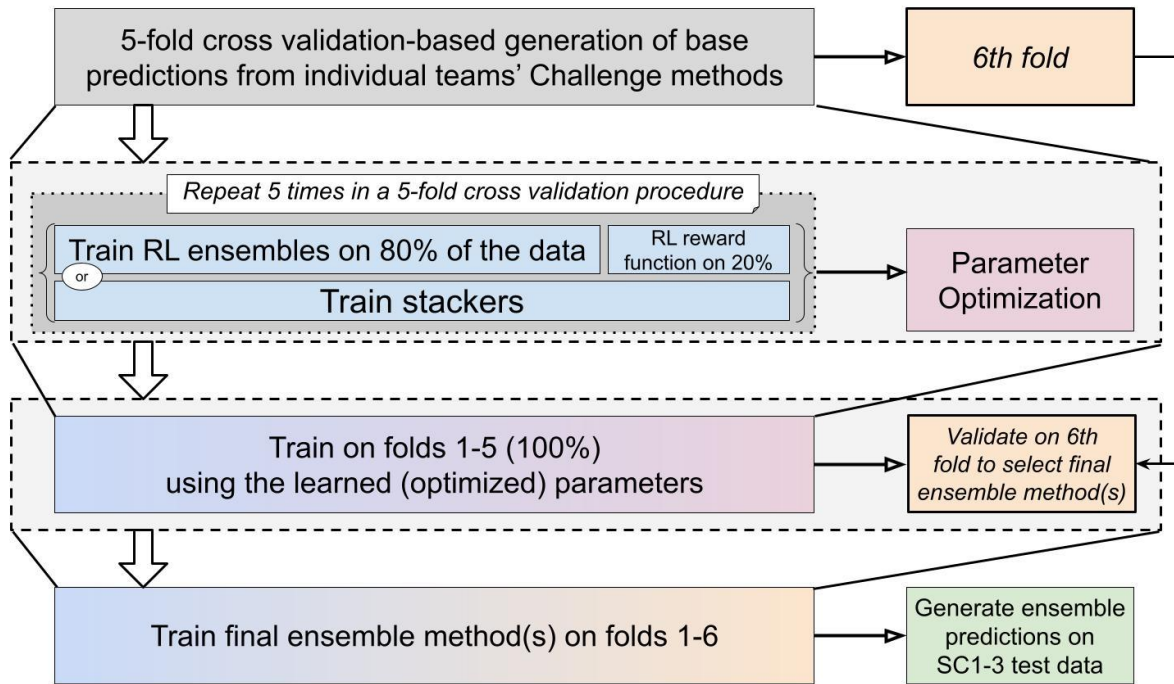

**S9 Fig:** Data-driven process used to train and evaluate heterogeneous ensembles for SC1-3.
