# Supplementary material for: Developing better digital health measures of Parkinson’s disease using free living data and a crowdsourced data analysis challenge
Source: PubMed Central journal article supplement (PMC10047543; doi:10.1371/journal.pdig.0000208), 2023-03-28
Supplement: pdig.0000208.s022.pdf [file pdig.0000208.s022.pdf]

## Supplemental Acknowledgements

### The BEAT-PD DREAM Challenge Consortium

Anastasia Adriano<sup>19</sup>, Varun Aggarwal<sup>20</sup>, Jay Alberts<sup>21</sup>, Izhar Bar-Gad<sup>5</sup>, Brett Beaulieu-Jones<sup>4,8</sup>, Maedeh Beheshti<sup>20</sup>, Saurabhchand Bhati<sup>22</sup>, Henryk Borzymowski<sup>2</sup>, Alma Cantu<sup>23</sup>, Nanxin Chen<sup>22</sup>, Silvia Del Din<sup>24</sup>, Amey Desai<sup>25</sup>, Yuval El-Hanani<sup>5</sup>, Luc J.W. Evers<sup>13,14</sup>, Luca Foschini<sup>15</sup>, Nilav Ghosh<sup>26</sup>, Marie-Philippe Gill<sup>22</sup>, Enrico Glaab<sup>27</sup>, Jann Goschenhofer<sup>2</sup>, Yuanfang Guan<sup>3</sup>, Jonathan Hampton<sup>28</sup>, Yidi Huang<sup>4</sup>, Monica Javidnia<sup>6,9</sup>, Arun Jayaraman<sup>12</sup>, Bruno Jedynak<sup>19</sup>, Sonal Joshi<sup>22</sup>, Mark S. Keller<sup>4</sup>, Sheraz Khan<sup>29</sup>, Jeff Knisley<sup>28</sup>, Abhiroop Kumar<sup>26</sup>, Christoph Kurz<sup>30</sup>, Yan-chak Li<sup>10</sup>, Alex Mariakakis<sup>16</sup>, Ayala Matzner<sup>5</sup>, Lars Lau Raket<sup>31</sup>, Encarna Micó Amigo<sup>24</sup>, Laureano Moro-Velaquez<sup>22</sup>, Adonay S. Nunes<sup>32</sup>, Larsson Omberg<sup>1</sup>, Alex Page<sup>6,7</sup>, Gaurav Pandey<sup>10</sup>, Jiajie Peng<sup>33</sup>, Jagdeep T. Podichetty<sup>20</sup>, Alisa Prusokiene<sup>35</sup>, Augustinas Prusokas<sup>34</sup>, Rana Zia Ur Rehman<sup>24</sup>, Renata Retkute<sup>36</sup>, Sakshi Sardar<sup>20</sup>, Mohammed Saqib<sup>4</sup>, Nicholas Shawen<sup>17,18</sup>, Solveig K. Sieberts<sup>1</sup>, Greta Smith<sup>6,9</sup>, Phil Synder<sup>1</sup>, Ana Stanescu<sup>11</sup>, Charles S. Venuto<sup>6,9</sup>, Yuxian Wang<sup>33</sup>, Robert Zielinski<sup>6,9</sup>,

<sup>1</sup> Sage Bionetworks, Seattle, Washington, United States of America

<sup>2</sup> Independent researcher

<sup>3</sup> Department of Computational Medicine and Bioinformatics, University of Michigan, Ann Arbor, Michigan, United States of America

<sup>4</sup> Department of Biomedical Informatics, Harvard Medical School, Boston, Massachusetts, United States of America

<sup>5</sup> Gonda Brain Research Center, Bar Ilan University, Ramat Gan, Israel

<sup>6</sup> Center for Health + Technology, University of Rochester Medical Center, Rochester, New York, United States of America

<sup>7</sup> Cardiology Division, University of Rochester Medical Center, Rochester, New York, United States of America

<sup>8</sup> Department of Neurology, Brigham and Women's Hospital, Boston, Massachusetts, United States of America

<sup>9</sup> Department of Neurology, University of Rochester, Rochester, New York, United States of America

<sup>10</sup> Department of Genetics and Genomic Sciences, Icahn School of Medicine at Mount Sinai, New York, New York, United States of America

<sup>11</sup> Department of Computing and Mathematics, University of West Georgia, Carrollton, Georgia, United States of America

<sup>12</sup> Max Nader Center for Rehabilitation Technologies & Outcomes Research, Shirley Ryan AbilityLab, Chicago, Illinois, United States of America

<sup>13</sup> Donders Institute for Brain, Cognition and Behaviour, Department of Neurology, Radboud University Medical Center, Nijmegen, the Netherlands

<sup>14</sup> Institute for Computing and Information Sciences, Radboud University, Nijmegen, the Netherlands

- <sup>15</sup> Evidation Health, Santa Barbara, California, United States of America
- <sup>16</sup> Department of Computer Science, University of Toronto, Toronto, Ontario, Canada
- <sup>17</sup> Max Nader Research Technologies & Outcomes Lab, Shirley Ryan AbilityLab, Chicago, Illinois, United States of America
- <sup>18</sup> Medical Scientist Training Program, Northwestern University Feinberg School of Medicine, Chicago, Illinois, United States of America
- <sup>19</sup> Fariborz Maseeh Department of Mathematics + Statistics, Portland State University, Portland, Oregon, United States of America
- <sup>20</sup> Critical Path Institute, Tucson, Arizona, United States of America
- <sup>21</sup> Department of Biomedical Engineering, Cleveland Clinic, Cleveland, Ohio, United States of America
- <sup>22</sup> Department of Electrical and Computer Engineering, Johns Hopkins University, Baltimore, Maryland, United States of America
- <sup>23</sup> School of Computing, Newcastle University, Newcastle upon Tyne, United Kingdom
- <sup>24</sup> Translational and Clinical Research Institute, Newcastle University, Newcastle upon Tyne, United Kingdom
- <sup>25</sup> Lifespark Technologies, Bombay, Mumbai, India
- <sup>26</sup> Optum Global Solutions, Hyderabad, India
- <sup>27</sup> Luxembourg Centre for Systems Biomedicine, University of Luxembourg, Esch-sur-Alzette, Luxembourg
- <sup>28</sup> Department of Mathematics and Statistics, East Tennessee State University, Johnson City, Tennessee, United States of America
- <sup>29</sup> Department of Radiology, Massachusetts General Hospital, Harvard Medical School, Boston, Massachusetts, United States of America
- <sup>30</sup> Helmholtz Zentrum München, Institute of Health Economics and Health Care Management, Neuherberg, Germany
- <sup>31</sup> Department of Data Science, H. Lundbeck A/S, Valby, Denmark
- <sup>32</sup> Department of Neurology, Massachusetts General Hospital, Harvard Medical School, Boston, Massachusetts, United States of America
- <sup>33</sup> School of Computer Science, Northwestern Polytechnical University, Xi'an, China
- <sup>34</sup> Department of Life Sciences, Imperial College London, United Kingdom
- <sup>35</sup> School of Natural and Environmental Sciences, Newcastle University, United Kingdom
- <sup>36</sup> Department of Plant Sciences, University of Cambridge, United Kingdom
